# Supplementary material
Source: PubMed Central journal article supplement (PMC4638220)

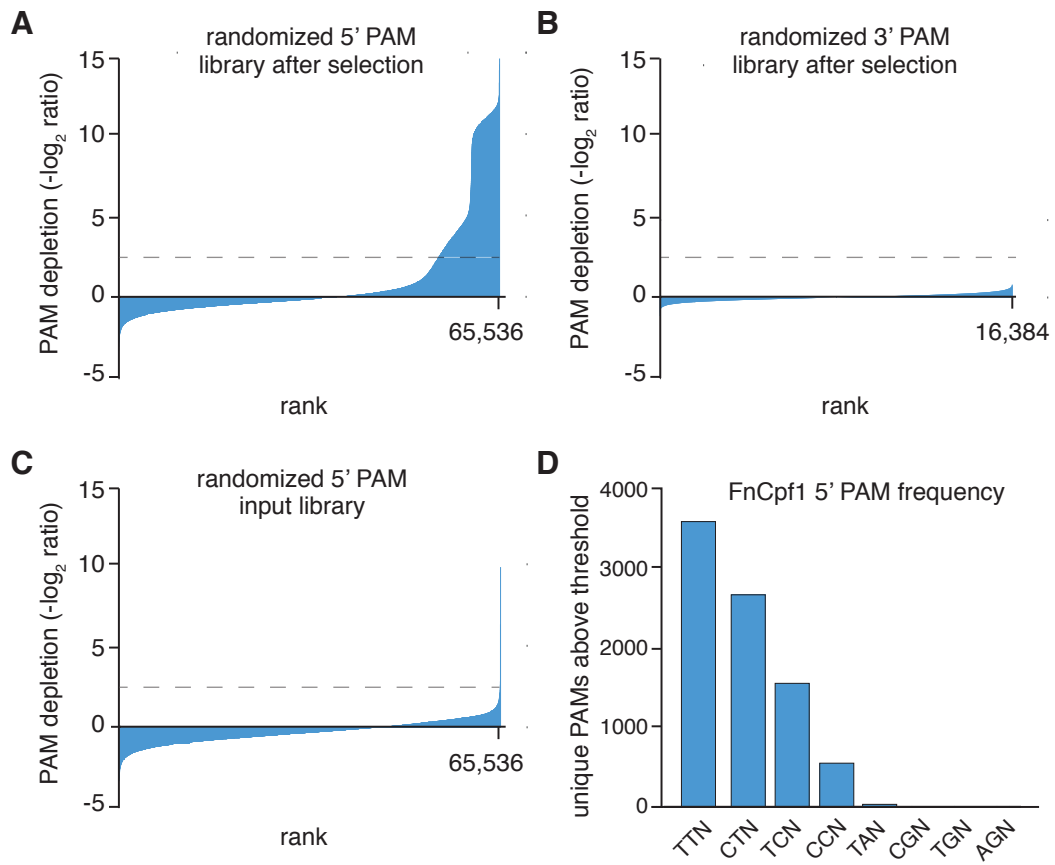

**Figure S1**

Supplement: NIHMS725840-supplement-1.pdf [file NIHMS725840-supplement-1.pdf]

**A**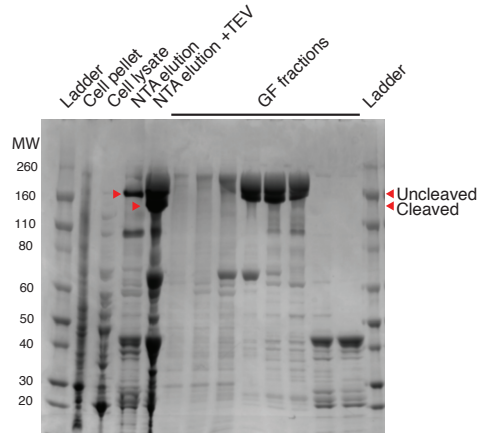**B**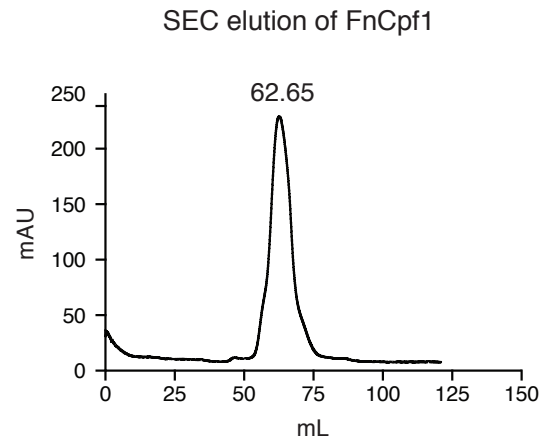**C**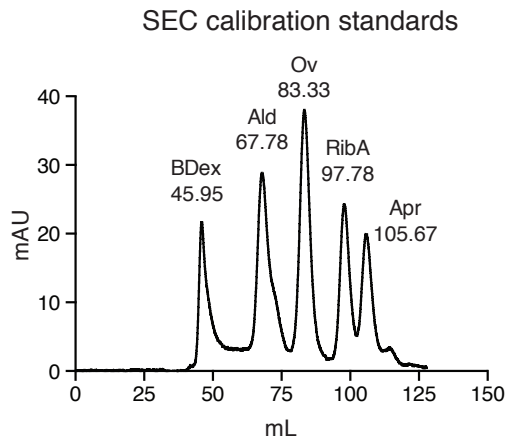**D**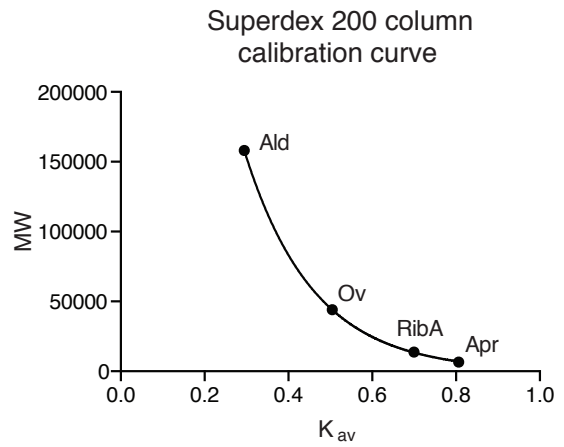**Figure S2**

Supplement: NIHMS725840-supplement-2.pdf [file NIHMS725840-supplement-2.pdf]

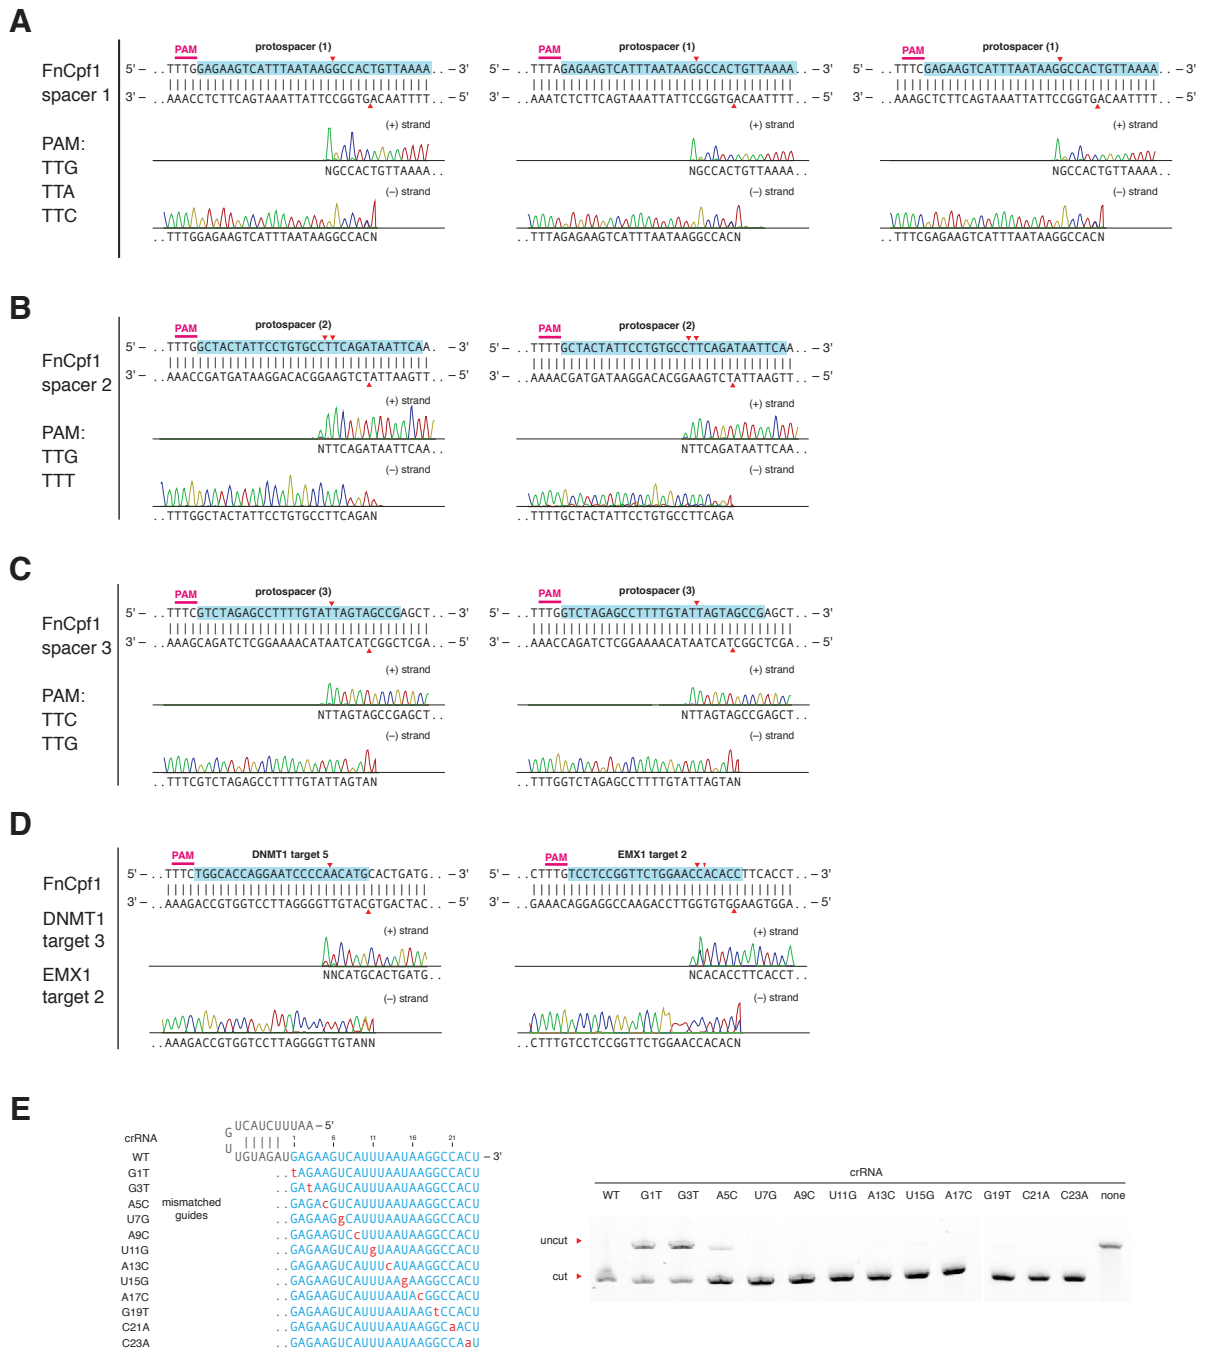

**Figure S3**

Supplement: NIHMS725840-supplement-3.pdf [file NIHMS725840-supplement-3.pdf]

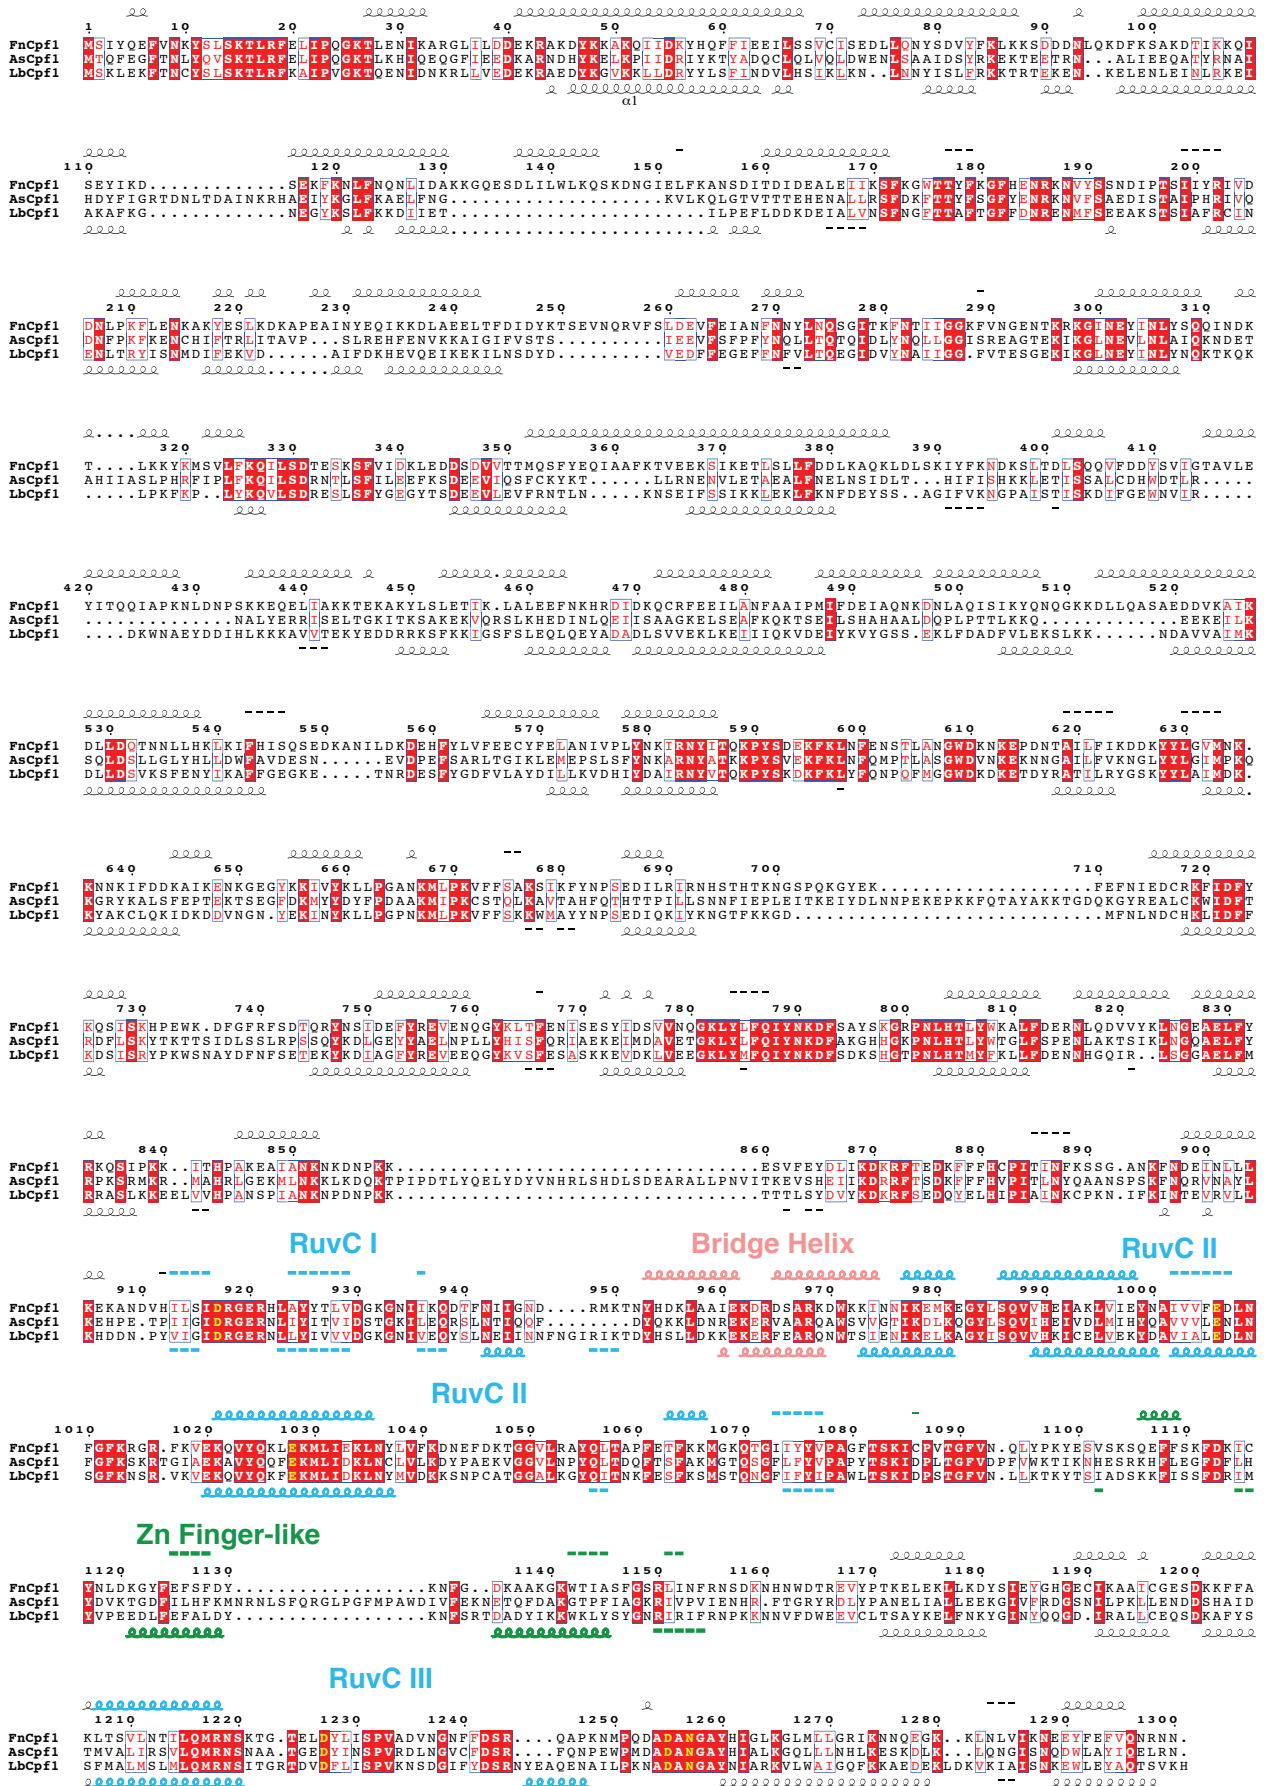

Figure S4

Supplement: NIHMS725840-supplement-4.pdf [file NIHMS725840-supplement-4.pdf]

**A**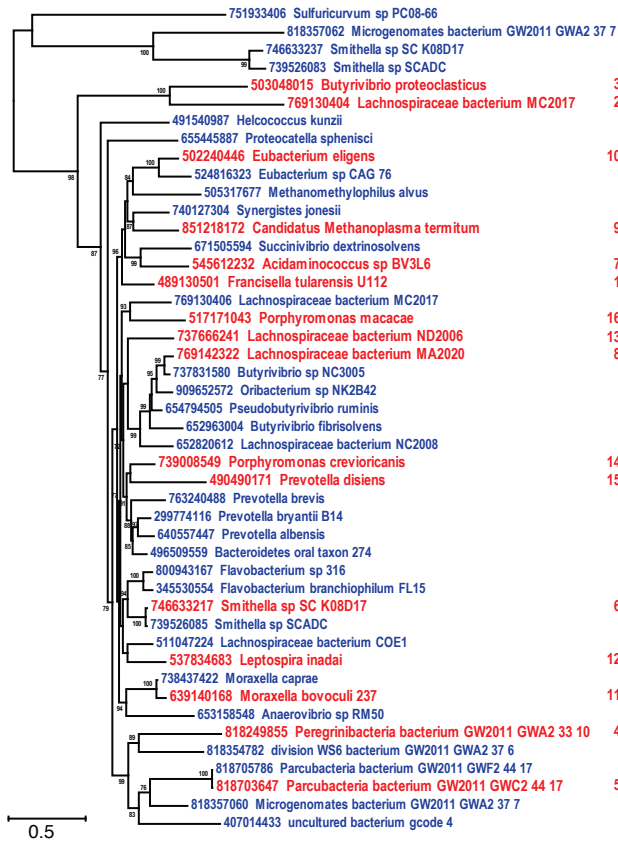**B**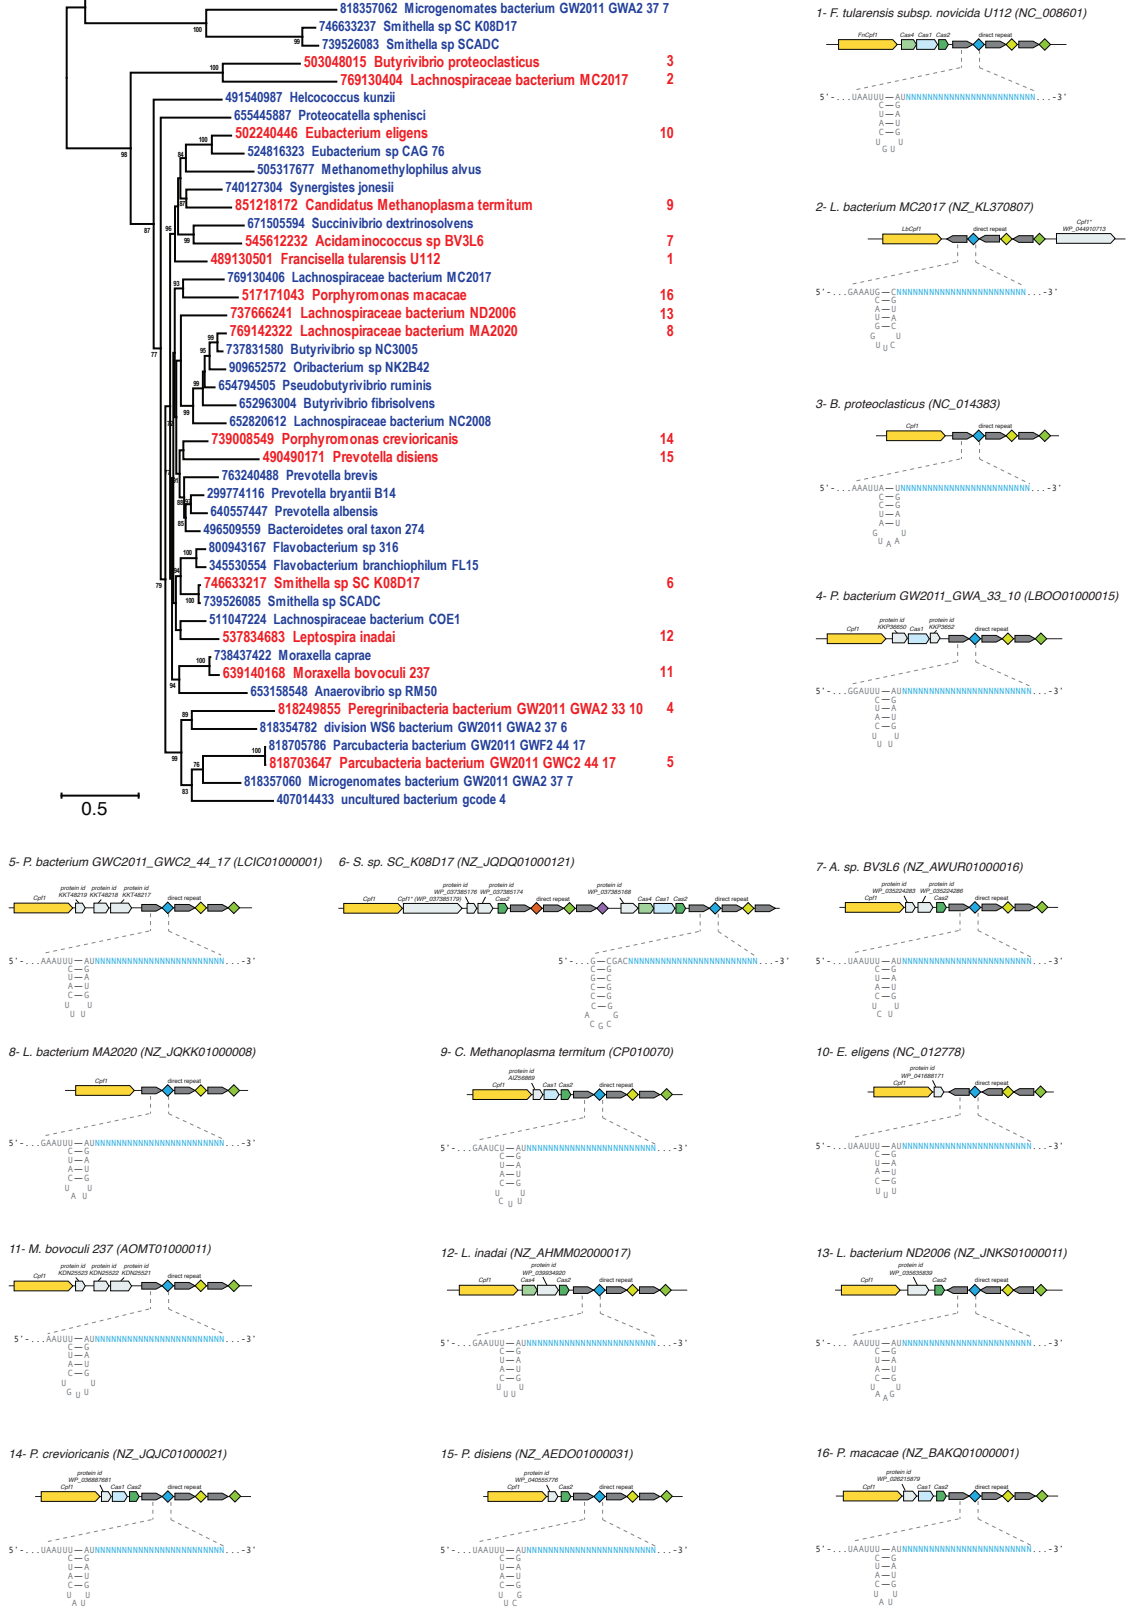**Figure S5**

Supplement: NIHMS725840-supplement-5.pdf [file NIHMS725840-supplement-5.pdf]

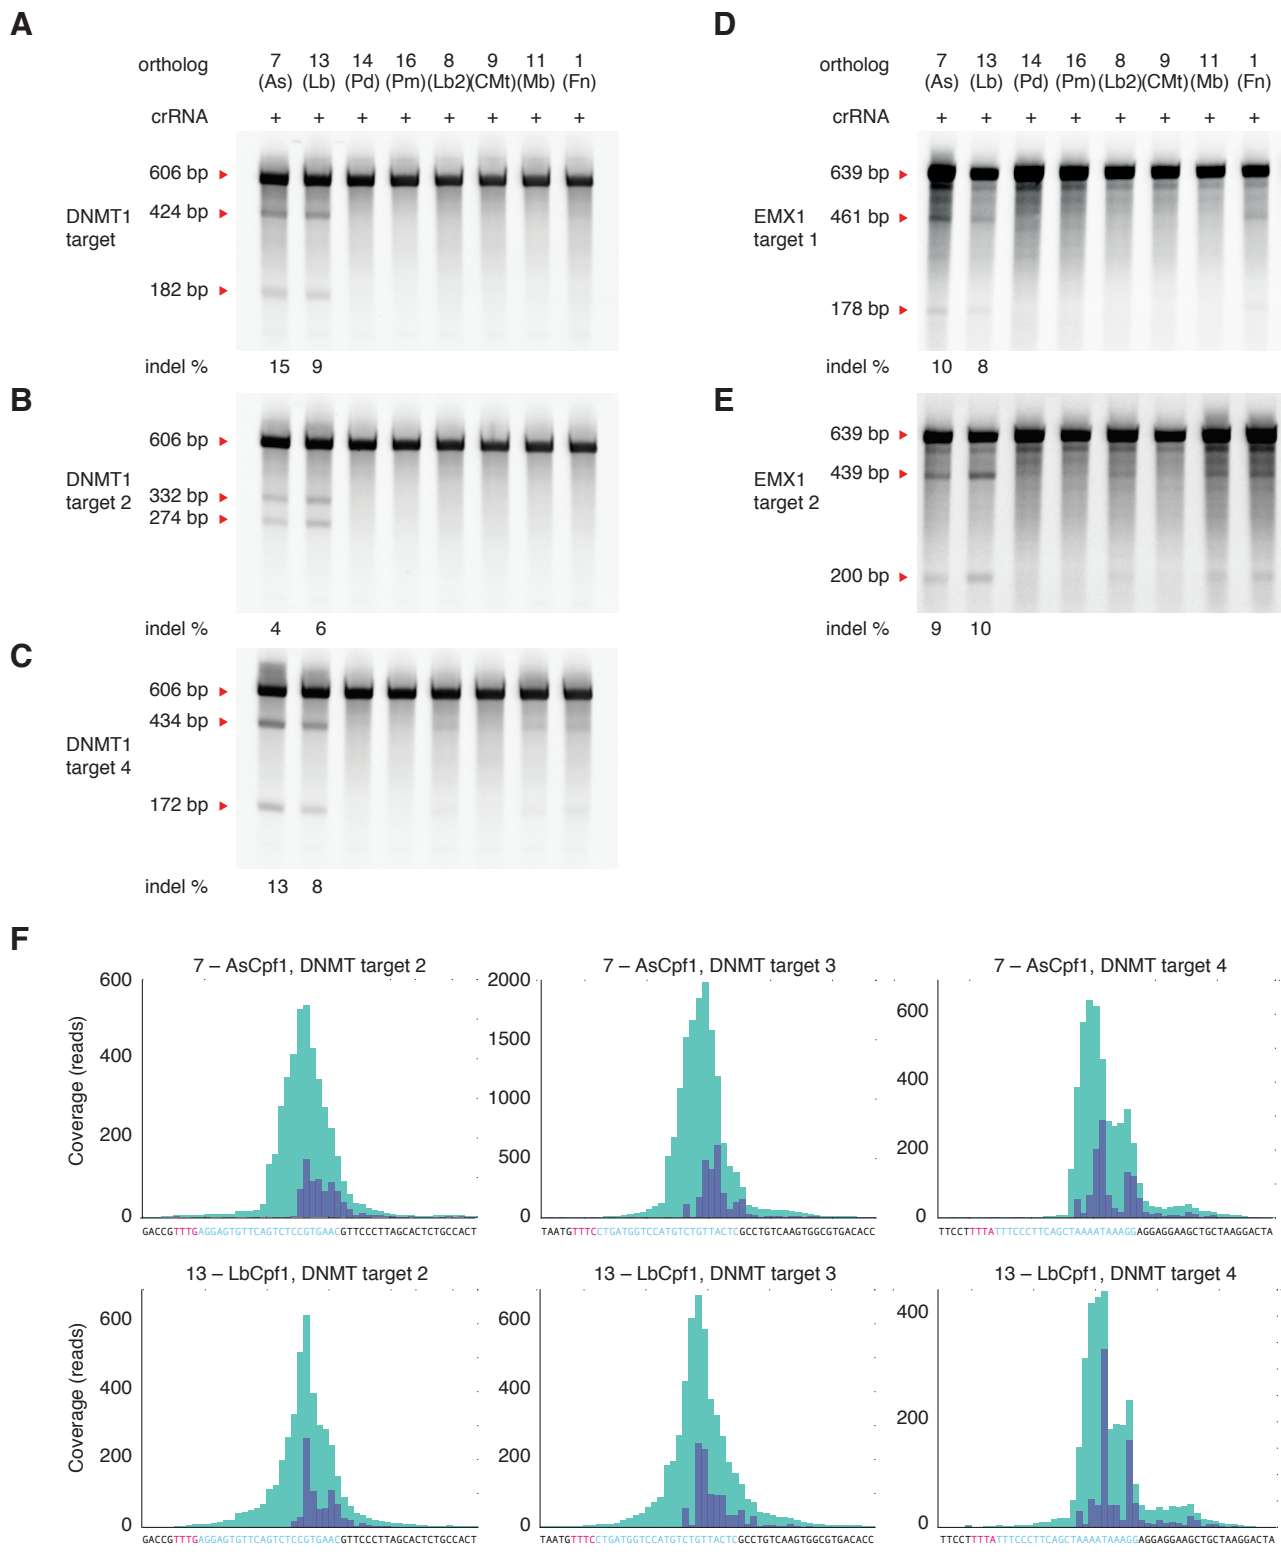

**Figure S7**

Supplement: NIHMS725840-supplement-7.pdf [file NIHMS725840-supplement-7.pdf]
